# Supplementary material for: Genomic Comparison between Salmonella Gallinarum and Pullorum: Differential Pseudogene Formation under Common Host Restriction
Source: PLoS One. 2013 Mar 15;8(3):e59427. doi: 10.1371/journal.pone.0059427 (PMC3598799; doi:10.1371/journal.pone.0059427)
Supplement: Table S1 — Comparison of gene content among Salmonella serogroup D strains. (XLS) [file pone.0059427.s001.xls]

## Sheet: Sheet1
Table S1. Comparison of gene content among Salmonella serogroup D strains.
a. Genes that are present in serovar Enteritidis but absent from serovar Gallinarum
gene	location	name	product
SENL_0230	complement(249114..252146)	-	putative viral enhancing factor
SENL_0281	complement(309634..310683)	-	conserved hypothetical pathogenicity island protein
SENL_0282	complement(310700..311443)	-	hypothetical protein
SENL_0283	311500..311772	-	hypothetical protein
SENL_0284	311799..312317	-	conserved hypothetical pathogenicity island protein
SENL_0285	312714..313355	-	hypothetical protein
SENL_0286	313352..316594	-	hypothetical protein
SENL_0287	316591..317037	-	rhs-associated protein
SENL_0288	complement(317103..317360)	-	hypothetical protein
SENL_0289	317422..317541	-	hypothetical protein
SENL_0296	321695..321814	safA	lipoprotein
SENL_0976	complement(1013381..1013791)	-	hypothetical protein
SENL_0977	1013812..1014441	-	hypothetical protein
SENL_0978	1014425..1015051	-	hypothetical protein
SENL_0979	1015048..1016757	-	Chimeric prophage tail protein (the product of a deletion event)
SENL_0980	1016757..1017338	-	phage tail fibre assembly protein
SENL_0981	1017816..1018784	sseI	putative type III secreted protein
SENL_0982	1019052..1019300	-	hypothetical protein
SENL_0983	complement(1019432..1020058)	-	hypothetical protein
SENL_0984	1020040..1020189	-	hypothetical protein
SENL_0985	complement(1020418..1021104)	-	prophage encoded virulence factor
SENL_0986	complement(1021375..1021566)	-	prophage encoded virulence protein
SENL_1462	1456465..1456983	-	putative thiol peroxidase
SENL_1463	complement(1457090..1457428)	-	hypothetical protein
SENL_1478	complement(1469415..1469687)	-	hypothetical protein
SENL_1479*	complement(1469680..1470297)	-	putative phage encoded exodeoxyribonuclease
SENL_1480*	complement(1470325..1470444)	-	predicted phage protein
SENL_1481*	complement(1470727..1470948)	-	putative phage encoded cell division inhibitor protein
SENL_1482*	1471653..1471907	-	putative phage membrane protein
SENL_1483*	complement(1471897..1472013)	-	hypothetical protein
SENL_1484*	complement(1472555..1472713)	-	predicted phage protein
SENL_1485*	1473334..1473624	-	putative phage encoded DNA-binding protein
SENL_1486	complement(1474337..1475269)	-	predicted phage protein
SENL_1487*	1476142..1476312	-	predicted phage protein
SENL_1488	1476375..1476974	-	hypothetical protein
SENL_1489*	1476974..1477264	-	hypothetical protein
SENL_1490	1477261..1477797	-	hypothetical protein
SENL_1491	complement(1477830..1477970)	-	hypothetical protein
SENL_1492*	complement(1479185..1479358)	-	predicted phage protein
SENL_1493*	1479968..1480363	-	putative bacteriophage protein
SENL_1494*	1480463..1480744	-	putative prophage membrane protein
SENL_1495*	1480741..1481286	-	conserved phage protein
SENL_1496*	1481310..1481492	-	putative phage encoded exported protein
SENL_1607	complement(1602463..1602795)	-	hypothetical protein
SENL_1608	complement(1602979..1603110)	-	hypothetical protein
SENL_1609	1603122..1603289	-	hypothetical protein
SENL_1610	complement(1603347..1604420)	-	putative isomerase
SENL_1611	complement(1604613..1605101)	-	putative regulatory protein
SENL_1612	1605146..1606654	-	putative monooxygenase
SENL_1613	1606644..1607885	-	putative multidrug efflux protein
SENL_1885	complement(1873762..1874508)	mipA	putative outer membrane protein
SENL_1886	1874935..1876869	yeaG	putative serine kinase
SENL_1887	complement(1876872..1876991)	-	hypothetical protein
SENL_1888	1876992..1878278	yeaH	hypothetical protein
SENL_2051	complement(2018787..2019008)	-	phage encoded DNA-binding protein
SENL_2052	2019221..2020228	-	phage protein
SENL_2053	complement(2020229..2020378)	-	gp21
SENL_2054	complement(2020513..2021082)	-	putative phage tail protein
SENL_2055	complement(2021082..2022644)	-	putative phage tail fibre protein
SENL_2056	complement(2022631..2023218)	-	putative phage tail protein
SENL_2057	complement(2023221..2024300)	-	phage protein
SENL_2058	complement(2024293..2024706)	-	phage protein
SENL_2059	complement(2024711..2025244)	-	putative phage baseplate protein
SENL_2060	complement(2025244..2026302)	-	phage tail protein
SENL_2061	complement(2026299..2027639)	-	hypothetical protein
SENL_2062	complement(2027673..2029601)	-	phage tape-measure protein
SENL_2063	complement(2029686..2030012)	-	phage protein
SENL_2064	complement(2030009..2030365)	-	phage tail tube protein
SENL_2065	complement(2030365..2031861)	-	phage tail sheath protein
SENL_2066	complement(2031851..2032015)	-	hypothetical protein
SENL_2067	complement(2032019..2032579)	-	phage protein
SENL_2068	complement(2032576..2033088)	-	phage protein
SENL_2069	complement(2033060..2033464)	-	phage protein
SENL_2070*	complement(2033461..2033784)	-	phage protein
SENL_2071*	complement(2033864..2035093)	-	phage major capsid protein
SENL_2072	complement(2035103..2035705)	-	phage pro-head protease
SENL_2073	complement(2035698..2036915)	-	phage portal protein
SENL_2074*	complement(2036909..2037067)	-	hypothetical protein
SENL_2075*	complement(2037064..2038794)	-	phage terminase (large subunit)
SENL_2076*	complement(2038794..2039132)	-	putative phage terminase (small subunit)
SENL_2077	complement(2039378..2039506)	-	phage protein
SENL_2078	complement(2039814..2040068)	-	putative exported phage protein
SENL_2079	complement(2040288..2040905)	-	putative phage encoded lysozyme
SENL_2080	complement(2040905..2041186)	-	prophage membrane protein
SENL_2081	complement(2041173..2041517)	-	putative prophage membrane protein
SENL_2082*	complement(2041651..2041836)	-	phage membrane protein
SENL_2083*	complement(2042236..2043288)	-	exported phage protein
SENL_2084	complement(2043359..2044111)	-	putative prophage antitermination protein
SENL_2085	complement(2044125..2045042)	-	phage protein
SENL_2086	complement(2045122..2045982)	-	phage protein
SENL_2087	complement(2045999..2046307)	-	crossover junction endodeoxyribonuclease rusa
SENL_2088	complement(2046397..2047278)	-	putative DNA methylase
SENL_2089	complement(2047275..2047748)	-	phage protein
SENL_2090	complement(2047745..2048719)	-	phage protein
SENL_2091	complement(2048716..2048940)	-	hypothetical protein
SENL_2092	complement(2048937..2050094)	-	phage immunity protein
SENL_2093	complement(2050091..2050645)	-	putative phage-encoded DNA-binding protein
SENL_2094	complement(2050674..2050898)	-	DNA binding protein
SENL_2095	2050996..2051691	-	phage encoded transcriptional regulator
SENL_2096*	2052979..2053896	-	phage encoded recombination associated protein
SENL_2097	2053991..2054530	-	phage protein
SENL_2098	2054601..2054831	-	hypothetical protein
SENL_2099	2054828..2055343	-	phage protein
SENL_2100*	2055340..2055699	-	phage protein
SENL_2101	2055971..2056264	-	phage protein
SENL_2102	2056261..2057124	-	phage protein
SENL_2103	2057133..2057690	-	phage protein
SENL_2104	2057992..2058948	-	phage integrase
SENL_3070	3071065..3071193	-	hypothetical protein
SENL_3071	3071324..3072439	-	probable amino acid transport protein
SENL_3072	complement(3072470..3072742)	yohL	hypothetical protein
SENL_3073	3072864..3073712	rcnA	putative High affinity Nickel transport protein
SENL_3074	complement(3073922..3074680)	-	hypothetical protein
SENL_3075	complement(3074667..3075179)	-	hypothetical protein
SENL_3076	complement(3075323..3076399)	-	hypothetical protein
SENL_3077	complement(3076396..3077139)	stdC	probable fimbrial chaperone protein
SENL_3078	complement(3077180..3079663)	stdB	probable outer membrane fimbrial usher protein
SENL_3079	complement(3079783..3080364)	stdA	probable fimbrial protein
SENL_3080	complement(3081083..3081715)	-	hypothetical protein
SENL_3081	complement(3081762..3082298)	-	outer membrane protein (associated with virulence)
SENL_3082	complement(3082344..3082529)	-	hypothetical protein
SENL_3083	complement(3083106..3083507)	-	hypothetical protein (associated with virulence)
SENL_4563	4602467..4603837	-	putative aldehyde dehydrogenase
SENL_4564	4604042..4604206	yjiS	hypothetical protein
SENL_4565	complement(4604283..4605203)	-	hypothetical protein
Note: Genes marked by '*'are uniquely present in Enteritidis but has not been found in other published Salmonella genomes. The location column uses the corordinate in the genome of Enteritidis str. P125109 (accession no. AM933172.1).
b. Genes that are present in bv. Gallinarum but absent from bv. Pullorum.
gene	location	name	product
SGAL_0866	883882..884777	-	putative inner membrane protein
SGAL_0867	complement(884899..885348)	-	Sugar phosphatase SupH
SGAL_1516	complement(1511904..1512617)	-	putative oxidoreductase
SGAL_1517	1512695..1513285	-	putative transcriptional regulator
SGAL_1518	1513489..1513650	-	putative lipoprotein
SGAL_1519	complement(1513864..1514973)	-	hypothetical protein
SGAL_1520	complement(1515365..1516216)	-	putative transcriptional regulator
SGAL_1521	1516674..1517360	-	putative lipoprotein
SGAL_1522	1517435..1519410	-	invasin-like protein
SGAL_1523	1519437..1520261	-	hypothetical protein
SGAL_1524	complement(1520649..1521359)	-	B3/4 domain protein
SGAL_1525	1521403..1522005	-	transcriptional regulator, Cro/CI family
SGAL_3754	3799696..3800880	torC	cytochrome c-type protein
SGAL_3753	complement(3798874..3799602)	torR	torCAD operon transcriptional regulatory protein
Note: The location column uses the corordinate in the genome of Gallinarum str. 287/91 (accession no. AM933173.1).
c. Genes that are present in biovar Pullorum but absent from biovar Gallinarum.
gene	location	name	product
SPUL_1298	1325808..1326137	mdtI	putative drug resistance protein
SPUL_1297	1325459..1325821	mdtJ	putative drug resistance protein
SPUL_1296	1325210..1325347	-	hypothetical protein
Note: The location column uses the corordinate in the genome of Pullorum str. RKS5078 (accession no. CP003047.1).
