# Supplementary material for: Genomic Comparison between Salmonella Gallinarum and Pullorum: Differential Pseudogene Formation under Common Host Restriction
Source: PLoS One. 2013 Mar 15;8(3):e59427. doi: 10.1371/journal.pone.0059427 (PMC3598799; doi:10.1371/journal.pone.0059427)
Supplement: Table S2 — Pseudogenes in Salmonella serogroup D strains. (XLS) [file pone.0059427.s002.xls]

## Sheet: Sheet1
Table S2. Pseudogenes in Salmonella serogroup D strains.
a. ancestral pseudogenes shared by biovar Gallinarum and biovar Pullorum.
gene	location	name	product
SPUL_0020	20060..23056	-	putative chitinase
SPUL_0045	complement(50449..51863)	-	putative transport protein
SPUL_0191	complement(207046..209592)	stiC	putativie fimbrial usher. putativie fimbrial usher
SPUL_0217	237263..237676	stfF	minor fimbrial subunit stff
SPUL_0219	238542..239048	-	hypothetical protein
SPUL_2681	complement(2684522..2684953)	-	exported pathogenicity island protein
SPUL_2678	2683619..2683860	-	putative cytoplasmic protein
SPUL_2636	2640979..2643540	stbC	outer membrane fimbrial usher protein
SPUL_2615	complement(2619433..2621245)	mod	type III restriction-modification system enzyme (StyLTI) modification methylase
SPUL_2610	complement(2612252..2613257)	-	AraC-family transcriptional regulator
SPUL_2471	2476001..2476972	aes	acetyl esterase
SPUL_2456	2459947..2460828	ybbN	thioredoxin-like protein
SPUL_2306	2314461..2315456	ybeQ	hypothetical protein
SPUL_2278	complement(2283200..2283316)	-	hypothetical protein
SPUL_1936	complement(1931146..1931538)	ycdC	putative transcriptional regulator
SPUL_1895	complement(1877519..1877986)	-	hypothetical protein
SPUL_1799	complement(1803885..1804839)	flhB	flagellar biosynthetic protein FlhB
SPUL_1650	1676347..1676805	-	hypothetical protein
SPUL_1619	complement(1647758..1649055)	dadA	D-amino acid dehydrogenase small subunit
SPUL_1510	1537580..1538717	yciW	hypothetical protein
SPUL_1413	1443263..1444212	sifB	putative virulence effector protein
SPUL_1364	1385813..1386104	-	putative Na+/H+ antiporter
SPUL_1363	1385263..1385813	-	putative LacI-family transcriptional regulator
SPUL_1361	complement(1383853..1384266)	pqaA	conserved hypothetical protein, phoPQ-regulated
SPUL_1198	complement(1229467..1230204)	orf245	Orf 245 protein
SPUL_1091	1121768..1122963	-	putative regulatory protein
SPUL_1090	complement(1121294..1121538)	yeaJ	membrane protein
SPUL_0983	1028501..1030162	flgK	flagellar hook-associated protein 1
SPUL_0864	924766..925660	pocR	pdu/cob regulatory protein PocR
SPUL_0833	complement(896223..898505)	sopA	secreted protein SopA
SPUL_0764	complement(815805..817216)	yegB	putative transporter protein
SPUL_0760	complement(811497..812212)	-	hypothetical protein
SPUL_0700	753678..755196	mglA	galactoside transport atp-binding protein mgla
SPUL_0617	670661..671986	-	putative transmembrane transpot protein
SPUL_0551	complement(602063..602196)	-	hypothetical protein
SPUL_0526	578789..580210	-	putative amino acid transporter
SPUL_0524	complement(575644..577070)	-	putative transcriptional regulator
SPUL_0433	485647..486222	-	putative lipoprotein
SPUL_0399	complement(449951..453064)	acrD	putative efflux pump
SPUL_0327	complement(356965..358009)	asrA	anaerobic sulfite reductase subunit A
SPUL_2784	2801137..2802398	ygaF	putative GAB DTP gene cluster repressor
SPUL_2794	complement(2809415..2809816)	stpA	DNA-binding protein StpA
SPUL_2798	2811510..2811836	ygaM	hypothetical protein
SPUL_2969	complement(2977236..2978577)	ygcY	glucarate dehydratase-related protein
SPUL_3118	complement(3124245..3126376)	speC	ornithine decarboxylase
SPUL_3146	3155895..3156760	yghU	possible transferase
SPUL_3236	3242468..3243466	ygjR	possible oxidoreductase
SPUL_3253	complement(3256483..3257846)	tdcG	L-serine dehydratase
SPUL_3299	3305839..3306799	-	hypothetical protein
SPUL_3539	3570411..3572143	yijP	hypothetical protein
SPUL_3741	complement(3779611..3782297)	-	two-component sensor protein histidine protein kinase
SPUL_3814	3851014..3852395	yicJ	sodium:galactoside family symporter
SPUL_3929	3971518..3974046	lpfC	outer membrane usher protein (LpfC)
SPUL_3947	complement(3990039..3991718)	bcsG	putative endoglucanase
SPUL_4176	4220130..4221253	smf	hypothetical protein
SPUL_4204	complement(4249369..4250825)	-	hypothetical protein
SPUL_4471	4528773..4531218	-	outer membrane fimbrial usher protein
SPUL_4512	complement(4560053..4561258)	hsdR	Type I restriction-modification system subunit R
SPUL_4579	complement(4628379..4629426)	sthE	putative fimbrial subunit
SPUL_4582	complement(4632625..4633287)	sthA	putative fimbrial chaperone protein
Note: The location column uses the corordinate in the genome of Pullorum str. RKS5078 (accession no. CP003047.1).
b. convergent pseudogenes shared by biovar Gallinarum and biovar Pullorum.
gene	location	name	product
SPUL_2653	2658362..2659414	phoE	outer membrane pore protein E precursor
SPUL_2451	complement(2453988..2455121)	-	outer membrane protein
SPUL_2210	complement(2216009..2216197)	dcoC	oxaloacetate decarboxylase gamma chain (ec 4.1.1.3)
SPUL_2155	complement(2156804..2158948)	dinG	probable ATP-dependent helicase DinG
SPUL_1345	1369110..1370046	-	hypothetical protein
SPUL_1299	complement(1326177..1326999)	-	putative exported protease
SPUL_1192	1223397..1224398	ynhG	hypothetical protein
SPUL_1171	complement(1199919..1200683)	ydiQ	putative electron transfer flavoprotein subunit
SPUL_1106	1135501..1136859	-	Putative metabolite transport protein
SPUL_1101	1130631..1131674	-	putative oxidoreductase
SPUL_2756	2757050..2768526	-	large repetitive protein
SPUL_2813	2825156..2826694	emrB	multidrug resistance protein B
SPUL_3734	complement(3772179..3773442)	-	putative membrane transport protein
SPUL_4125	4187917..4189723	kefB	glutathione-regulated potassium-efflux system protein (K(+)/H(+)antiporter)
SPUL_4321	complement(4386600..4387857)	yjeH	putative permease
Note: The location column uses the corordinate in the genome of Pullorum str. RKS5078 (accession no. CP003047.1).
c. ancestral pseudogenes shared by two Pullorum strains.
gene	location	name	product
SPUL_0041	44310..46025	-	possible sulfatase
SPUL_0064	69990..70783	citE2	citrate lyase beta chain
SPUL_0089	95692..97581	-	putative sulfatase
SPUL_0121	complement(132030..133601)	leuA	2-isopropylmalate synthase
SPUL_0123	135733..137432	ilvI	acetolactate synthase isozyme III large subunit
SPUL_0138	152484..153404	ddlB	D-alanine:D-alanine ligase B
SPUL_0170	complement(185443..187066)	yacH	hypothetical protein
SPUL_0214	233245..235902	stfC	outer membrane usher protein stfC
SPUL_2653	2658362..2659414	phoE	outer membrane pore protein E precursor
SPUL_2643	complement(2649753..2650379)	-	3-isopropylmalate dehydratase small subunit 2
SPUL_2624	2630699..2632156	-	putative outer membrane efflux lipoprotein
SPUL_2614	complement(2616500..2619393)	res	type III restriction-modification system enzyme
SPUL_2493	2497679..2498149	ylaC	hypothetical protein
SPUL_2451	complement(2453988..2455121)	-	outer membrane protein
SPUL_2436	complement(2438169..2439466)	ybbY	putative permease protein
SPUL_2432	2433816..2434865	allD	ureidoglycolate dehydrogenase
SPUL_2361	2364770..2365878	ybdN	hypothetical protein
SPUL_2277	complement(2281491..2282897)	ybfM	putative outer membrane protein
SPUL_2212	2217813..2218761	-	LysR-family transcriptional regulator
SPUL_2210	complement(2216009..2216197)	dcoC	oxaloacetate decarboxylase gamma chain
SPUL_2155	complement(2156804..2158948)	dinG	probable ATP-dependent helicase DinG
SPUL_2043	complement(2044315..2046771)	dmsA	anaerobic dimethyl sulfoxide reductase chain A precursor
SPUL_2021	complement(2017648..2018878)	ycaQ	hypothetical protein
SPUL_2006	2000564..2000682	-	hypothetical protein
SPUL_1786	1790809..1791376	yecD	putative hydrolase
SPUL_1682	complement(1701500..1702660)	-	transposase
SPUL_1676	1697963..1698094	-	hypothetical protein
SPUL_1674	complement(1696760..1696886)	-	hypothetical protein
SPUL_1656	complement(1681632..1681918)	-	hypothetical protein
SPUL_1568	complement(1594502..1595398)	ychK	hypothetical protein
SPUL_1561	complement(1586058..1586198)	-	hypothetical protein
SPUL_1551	1576672..1576968	yciI	hypothetical protein
SPUL_1506	complement(1534616..1535592)	-	hypothetical protein
SPUL_1486	1515461..1516397	-	putative oxidoreductase
SPUL_1469	complement(1502049..1502380)	-	Putative multi-drug transporter
SPUL_1417	1447350..1448185	-	putative benzoate membrane transport protein
SPUL_1391	1418802..1419695	yddE	hypothetical protein
SPUL_1387	1412043..1415783	narZ	respiratory nitrate reductase 2 alpha chain
SPUL_1368	complement(1392089..1393862)	-	putative hydrolase
SPUL_1345	1369110..1370046	-	hypothetical protein
SPUL_1311	complement(1337484..1338097)	ynfI	hypothetical protein
SPUL_1299	complement(1326177..1326999)	-	putative exported protease
SPUL_1197	complement(1228515..1229408)	orf32	putative hydrolase
SPUL_1192	1223397..1224398	ynhG	hypothetical protein
SPUL_1171	complement(1199919..1200683)	ydiQ	putative electron transfer flavoprotein subunit
SPUL_1169	complement(1197619..1198905)	ydiS	putative electron transfer flavoprotein-quinone oxidoreductase
SPUL_1166	1193032..1195409	pps	phosphoenolpyruvate synthase
SPUL_1106	1135501..1136859	-	Putative metabolite transport protein
SPUL_1101	1130631..1131674	-	putative oxidoreductase
SPUL_1056	complement(1100458..1100982)	-	putative cytochrome
SPUL_1005	complement(1050909..1053072)	fhuE	outer-membrane receptor for Fe(iii)-coprogen, fe(iii)-ferrioxamine b and fe(iii)-rhodotrulic acid
SPUL_0952	complement(1003822..1004196)	msyB	acidic protein MsyB; multicopy suppressor of SecY
SPUL_0886	944149..945676	yeeO	putative membrane transport protein
SPUL_0742	796202..797223	pegD	hypothetical protein
SPUL_0672	complement(726973..727661)	yeiU	hypothetical protein
SPUL_0654	706161..708767	sspH2	secreted effector protein
SPUL_0644	701153..702102	ccmH	cytochrome c-type biogenesis protein H1
SPUL_0627	686825..687475	alkB	AlkB protein
SPUL_0618	672001..673202	-	putative MR-MLE-family protein
SPUL_0577	complement(629411..630327)	elaC	Ribonuclease Z
SPUL_0558	608065..608250	-	hypothetical protein
SPUL_0548	complement(596864..598385)	yfcC	hypothetical protein
SPUL_0532	584690..585472	hisJ	histidine-binding periplasmic protein
SPUL_0481	complement(531404..532795)	pgtP	phosphoglycerate transporter protein
SPUL_0469	519956..521199	mntH	manganese transport protein MntH
SPUL_0458	507455..508381	yfeR	putative transcriptional regulator
SPUL_0437	489431..490264	cysU	sulphate transport system permease protein CysT
SPUL_0429	complement(482740..483639)	hemF	Coproporphyrinogen III oxidase, aerobic
SPUL_0405	460918..461147	-	hypothetical protein
SPUL_0402	complement(457545..458843)	-	hypothetical protein
SPUL_0386	436911..438074	-	conserved regulatory protein
SPUL_0374	422511..424723	-	hypothetical protein
SPUL_0280	complement(307099..307686)	yfiK	hypothetical protein
SPUL_0276	complement(303871..304289)	trxC	thioredoxin 2
SPUL_2756	2757050..2768526	-	large repetitive protein
SPUL_2786	2803787..2805070	gabT	4-aminobutyrate aminotransferase
SPUL_2799	complement(2811920..2813254)	-	putative transcriptional regulator
SPUL_2807	2819335..2820399	proW	glycine betaine/L-proline transport system permease protein P
SPUL_2813	2825156..2826694	emrB	multidrug resistance protein B
SPUL_2931	complement(2934000..2934279)	ygbE	hypothetical protein
SPUL_2936	complement(2938883..2939176)	ygbF	hypothetical protein
SPUL_2965	complement(2970500..2971796)	ygcA	putative RNA methyltransferase
SPUL_3027	complement(3040319..3041027)	ygeA	hypothetical protein
SPUL_3045	complement(3057624..3057895)	ygfX	hypothetical protein
SPUL_3174	3177892..3179346	-	possible membrane transport protein
SPUL_3245	3249416..3249902	yqjF	hypothetical protein
SPUL_3252	complement(3254823..3256154)	yhaO	putative membrane transport protein
SPUL_3592	3627381..3628931	ydeV	putative sugar kinase
SPUL_3658	3685446..3686432	-	hypothetical protein
SPUL_3418	complement(3427009..3427781)	yjaD	hypothetical protein
SPUL_3734	complement(3772179..3773442)	-	putative membrane transport protein
SPUL_3743	3782425..3783357	torT	Solute binding receptor protein
SPUL_3744	3783357..3784338	torA	trimethylamine-N-oxide reductase precursor
SPUL_3754	3791785..3792742	-	cytochrome C-type biogenesis protein
SPUL_3794	3829847..3830956	-	putative transferase
SPUL_3866	complement(3904247..3905557)	-	probable glucarate transporter
SPUL_3931	3975149..3975675	lpfE	fimbrial protein (LpfE)
SPUL_3962	4010730..4011497	yhjH	hypothetical protein
SPUL_3989	4042383..4045124	yhiH	hypothetical ABC transporter ATP-binding protein
SPUL_4125	4187917..4189723	kefB	glutathione-regulated potassium-efflux system protein (K(+)/H(+)antiporter)
SPUL_4273	4337040..4337541	-	cytochrome c-type biogenesis protein
SPUL_4291	4359333..4360710	melB	melibiose carrier protein
SPUL_4297	4367577..4369620	dmsA2	hypothetical protein
SPUL_4306	complement(4375468..4375739)	-	putative GerE family regulatory protein
SPUL_4321	complement(4386600..4387857)	yjeH	putative permease
SPUL_4328	4393533..4393708	-	entericidin A precursor
SPUL_4349	4415053..4416910	mutL	DNA mismatch repair protein
SPUL_4361	4428236..4428934	yjfJ	hypothetical protein
SPUL_4458	complement(4518912..4519518)	idnT	gnt-ii system l-idonate transporter (l-ido transporter)
SPUL_4459	complement(4519510..4520195)	idnO	gluconate 5-dehydrogenase
SPUL_4486	complement(4539820..4541445)	yjhP	hypothetical protein
SPUL_4500	complement(4549785..4550693)	yjiE	probable transcriptional activator
SPUL_4529	4580684..4581464	-	PTS transport system, IIC component
Note: The location column uses the corordinate in the genome of Pullorum str. RKS5078 (accession no. CP003047.1).
