# Supplementary material for: Genomic Comparison between Salmonella Gallinarum and Pullorum: Differential Pseudogene Formation under Common Host Restriction
Source: PLoS One. 2013 Mar 15;8(3):e59427. doi: 10.1371/journal.pone.0059427 (PMC3598799; doi:10.1371/journal.pone.0059427)
Supplement: Table S3 — Genes that are intact in serovar Enteritidis but are inactivated in serovar Dublin. (XLS) [file pone.0059427.s003.xls]

## Sheet: Sheet1
Table S3. Genes that are intact in serovar Enteritidis but are inactivated in serovar Dublin.
gene	location	name	product
SENL_0045*	complement(50205..51620)	-	putative transport protein
SENL_0105	116184..116603	-	hypothetical protein
SENL_0296	321695..321814	safA	lipoprotein
SENL_0304	329214..329429	-	hypothetical protein
SENL_0320	complement(345583..345735)	-	hypothetical protein
SENL_0366	complement(395394..397019)	prpR	propionate catabolism operon regulatory protein
SENL_0382	414981..416192	-	possible efflux pump
SENL_0398*	complement(430003..430134)	-	hypothetical protein
SENL_0404	435565..437382	malZ	maltodextrin glucosidase
SENL_0464	complement(491801..493501)	ybaE	putative solute-binding protein
SENL_0557	584268..584762	fimI	major pilin protein
SENL_0564	complement(591714..591935)	-	hypothetical protein
SENL_0582	606659..608629	apeE	outer membrane esterase
SENL_0608	complement(635544..636632)	ybdH	putative oxidoreductase
SENL_0617	645804..647852	-	molybdopterin-containing oxidoreductase catalytic subunit
SENL_0625	complement(651858..652664)	rna	ribonuclease I precursor
SENL_0626	complement(652774..654237)	citT	citrate carrier
SENL_0635	659896..661557	dpiB	sensor kinase DpiB
SENL_0664*	686402..688330	-	putative sigma-54 dependent transcriptional regulator
SENL_0695*	721605..723011	ybfM	putative outer membrane protein
SENL_0711	738046..738159	-	hypothetical protein
SENL_0789	complement(817943..819232)	bioA	adenosylmethionine-8-amino-7-oxononanoate aminotransferase
SENL_0806	834691..835251	-	putative inner membrane protein
SENL_0841	865975..866871	-	putative inner membrane protein
SENL_0862*	887356..887619	-	hypothetical protein
SENL_1060	1099505..1100785	-	putative transporter
SENL_1068	complement(1106007..1107398)	-	hypothetical protein
SENL_1071*	1110476..1110946	-	hypothetical protein
SENL_1076	1113089..1113580	-	hypothetical protein
SENL_1082	complement(1116990..1118186)	ompS	outer membrane protein S1
SENL_1135	complement(1159887..1160039)	-	hypothetical protein
SENL_1150	1169160..1169342	-	L-arabinose transport system permease protein araH
SENL_1229*	1239366..1241726	-	hypothetical protein
SENL_1236	complement(1246367..1246936)	-	hypothetical protein
SENL_1243	1249229..1249720	-	putative phage terminase; small subunit
SENL_1246	1251445..1251876	-	hypothetical protein
SENL_1247	1252089..1252325	-	hypothetical protein
SENL_1252	complement(1255367..1256281)	pagO	inner membrane protein (PagO)
SENL_1255*	1258067..1259227	-	transposase
SENL_1260	complement(1261966..1262346)	-	hypothetical protein
SENL_1519	complement(1504432..1505193)	-	putative periplasmic amino acid-binding protein
SENL_1607	complement(1602463..1602795)	-	hypothetical protein
SENL_1641*	1633777..1634877	ydeE	hypothetical protein
SENL_1653	complement(1644815..1645834)	rspB	starvation sensing protein RspB
SENL_1684	1675381..1676763	ydgI	putative amino acid permease
SENL_1685	complement(1676825..1677151)	ydgC	hypothetical protein
SENL_1710*	complement(1703553..1704413)	pdxY	pyridoxamine kinase
SENL_1767	1753186..1753914	orf242	putative transcriptional regulator
SENL_1912	complement(1891317..1892186)	aadA	aminoglycoside-resistance protein
SENL_1924*	complement(1901336..1902379)	-	hypothetical protein
SENL_1991	complement(1964709..1965470)	-	putative inner membrane lipoprotein
SENL_2060	complement(2025244..2026302)	-	phage tail protein
SENL_2121	2074347..2074748	-	hypothetical protein
SENL_2138	2088818..2089516	-	Putative DNA-binding protein
SENL_2199	complement(2144603..2144725)	-	hypothetical protein
SENL_2262	2213130..2216126	yegE	hypothetical protein
SENL_2264	2217097..2218449	yegD	hypothetical protein
SENL_2280	complement(2237525..2237641)	-	hypothetical protein
SENL_2333*	complement(2288492..2290012)	mglA	galactoside transport atp-binding protein mgla
SENL_2334	complement(2290146..2291144)	mglB	D-galactose-binding periplasmic protein precursor
SENL_2383	2339076..2339312	-	hypothetical protein
SENL_2429	2388791..2389813	-	hypothetical protein
SENL_2476	2436047..2437261	yfbQ	putative aminotransferase
SENL_2520	complement(2478659..2479834)	-	putative transmembrane transporter
SENL_2523	2480561..2480809	-	putative DNA-binding protein
SENL_2550	complement(2509554..2510636)	pgtC	phosphoglycerate transport regulatory protein PgtC precursor
SENL_2560	complement(2519442..2521094)	-	putative decarboxylase
SENL_2666*	complement(2628623..2634679)	shdA	host colonisation factor (ShdA)
SENL_2668	complement(2642855..2648434)	ratA	putative exported protein (RatA)
SENL_2687	complement(2668595..2673529)	-	putative lipoprotein
SENL_2794*	2792636..2794816	-	putative type I secretion protein, ATP-binding protein
SENL_2819	2822769..2823746	-	hypothetical protein
SENL_2822*	2826525..2827808	gabT	4-aminobutyrate aminotransferase
SENL_2846	2845846..2845962	-	hypothetical protein
SENL_2850	complement(2849481..2850851)	-	putative glycoporin
SENL_2898	complement(2894557..2895423)	avrA	pathogenicity island membrane protein
SENL_2934	2929977..2930093	-	hypothetical protein
SENL_2949	complement(2942791..2943567)	ygbM	putative hydroxypyruvate isomerase
SENL_2979*	complement(2967773..2970325)	ygcB	hypothetical protein
SENL_3005*	complement(3000587..3001927)	ygcY	glucarate dehydratase-related protein
SENL_3067*	complement(3067078..3068076)	kduI	4-deoxy-L-threo-5-hexosulose-uronate ketol-isomerase
SENL_3117	complement(3115576..3116211)	yggA	possible membrane transport protein
SENL_3133	complement(3130320..3131327)	-	putative oxidoreductase
SENL_3159	complement(3154506..3154658)	-	hypothetical protein
SENL_3187	3179724..3179879	-	hypothetical protein
SENL_3198	complement(3194030..3195082)	-	possible ABC-transport protein, periplasmic-binding component
SENL_3296	3286461..3287447	yqjG	hypothetical protein
SENL_3314	3306060..3307631	garD	D-galactarate dehydratase
SENL_3362	complement(3353156..3354121)	-	hypothetical protein
SENL_3451	3442844..3444001	acrE	acriflavine resistance protein E
SENL_4166	complement(4183697..4184743)	-	hypothetical protein
SENL_4064	complement(4089649..4090890)	-	putative coproporphyrinogen III oxidase
SENL_4023	4040929..4041057	-	hypothetical protein
SENL_3930*	complement(3935130..3936503)	-	probable PTS system permease
SENL_3851	complement(3852769..3855567)	-	putative NtrC-family transcriptional regulator
SENL_3837	3839937..3840062	-	hypothetical protein
SENL_3836*	complement(3838476..3839240)	marT	putative transcriptional regulator (MarT)
SENL_3826	complement(3827189..3828571)	yicJ	sodium:galactoside family symporter
SENL_3791*	complement(3791908..3792717)	rfaZ	lipopolysaccharide core biosynthesis protein RfaZ
SENL_3773	3772717..3773952	-	putative racemase
SENL_3711*	complement(3705125..3707653)	lpfC	outer membrane usher protein (LpfC)
SENL_3651*	complement(3633809..3636550)	yhiH	hypothetical ABC transporter ATP-binding protein
SENL_3579	complement(3561110..3562129)	rtcA	rna 3'-terminal phosphate cyclase
SENL_3547	complement(3523969..3525138)	-	type II secretion system protein
SENL_3519	complement(3493741..3494052)	-	hypothetical protein
SENL_4336	complement(4391622..4393265)	yjdB	hypothetical protein
SENL_4355	complement(4416846..4417181)	-	hypothetical protein
SENL_4502	4550782..4551969	yjgN	putative innner membrane protein
SENL_4530	4577568..4578413	-	putative outer membrane protein
SENL_4539	complement(4584809..4585000)	-	hypothetical protein
SENL_4561	4601333..4602286	-	hypothetical protein
SENL_4567	complement(4608728..4610032)	hsdS	putative Type I restriction-modification system specificity subunit M
SENL_4570*	complement(4613162..4614415)	-	putative Type I restriction-modification system methyltransferase
SENL_4632	4674584..4675933	creD	inner membrane protein
Note: Genes marked by '*'are also inactivated in biovar Gallinarum or biovar Pullorum.
